# Supplementary material for: High-Frequency Pulsed Electric Field Ablation in Beagle Model for Treatment of Prostate Cancer
Source: Cancers (Basel). 2022 Oct 12;14(20):4987. doi: 10.3390/cancers14204987 (PMC9599345; doi:10.3390/cancers14204987)
Supplement: Supplementary file 1 [file cancers-14-04987-s001.zip › cancers-1910132-SI.pdf]

## *Supplementary Material*

### **High-Frequency Pulsed Electric Field Ablation in Beagle Model for treatment of Prostate Cancer**

**Seung Jeong<sup>1†</sup>, Song Hee Kim<sup>2†</sup>, Hongbae Kim<sup>1</sup>, Jeon Min Kang<sup>2</sup>, Yubeen Park<sup>2</sup>, Dong-Sung Won<sup>2</sup>, Ji Won Kim<sup>2</sup>, Dae Sung Ryu<sup>2</sup>, Chu Hui Zeng<sup>2</sup>, Jong Hoon Chung<sup>1,3</sup>, Bumjin Lim<sup>4\*</sup>, Jung-Hoon Park<sup>2\*</sup>**

<sup>1</sup> Department of Biosystems & Biomaterials Science and Engineering, Seoul National University, Seoul, 08826, Republic of Korea

<sup>2</sup> Biomedical Engineering Research Center, Asan Institute for Life Sciences, Asan Medical Center, 88 Olympic-ro 43-gil, Songpa-gu, Seoul, 05505, Republic of Korea

<sup>3</sup> Research Institute for Agriculture and Life Sciences, Seoul National University, Seoul, 08826, Republic of Korea

<sup>4</sup> Department of Urology, Asan Medical Center, University of Ulsan College of Medicine, 88 Olympic-ro 43-gil, Songpa-gu, Seoul, 05505, Republic of Korea

<sup>†</sup>These authors have contributed equally to this work and share first authorship

#### **\* Correspondence:**

Bumjin Lim M.D.<sup>1</sup>, and Jung-Hoon Park, Ph.D.<sup>2</sup>

<sup>1</sup>Department of Urology, Asan Medical Center, University of Ulsan College of Medicine, 88 Olympic-ro 43-gil, Songpa-gu, Seoul 05505, Republic of Korea  
Tel: 82-2-3010-1835 Fax: 82-2-476-0090

E-mail: lbj1986@hanmail.net

<sup>2</sup>Biomedical Engineering Research Center, Asan Institute for Life Sciences, Asan Medical Center, 88 Olympic-ro 43-gil, Songpa-gu, Seoul, 05505, Republic of Korea  
Tel: 82-2-3010-4123 Fax: 82-2-476-0090

E-mail: jhparkz@amc.seoul.kr

**Keywords:** Irreversible electroporation, High-frequency pulsed electric field, Prostate Cancer, Decellularization, Regeneration

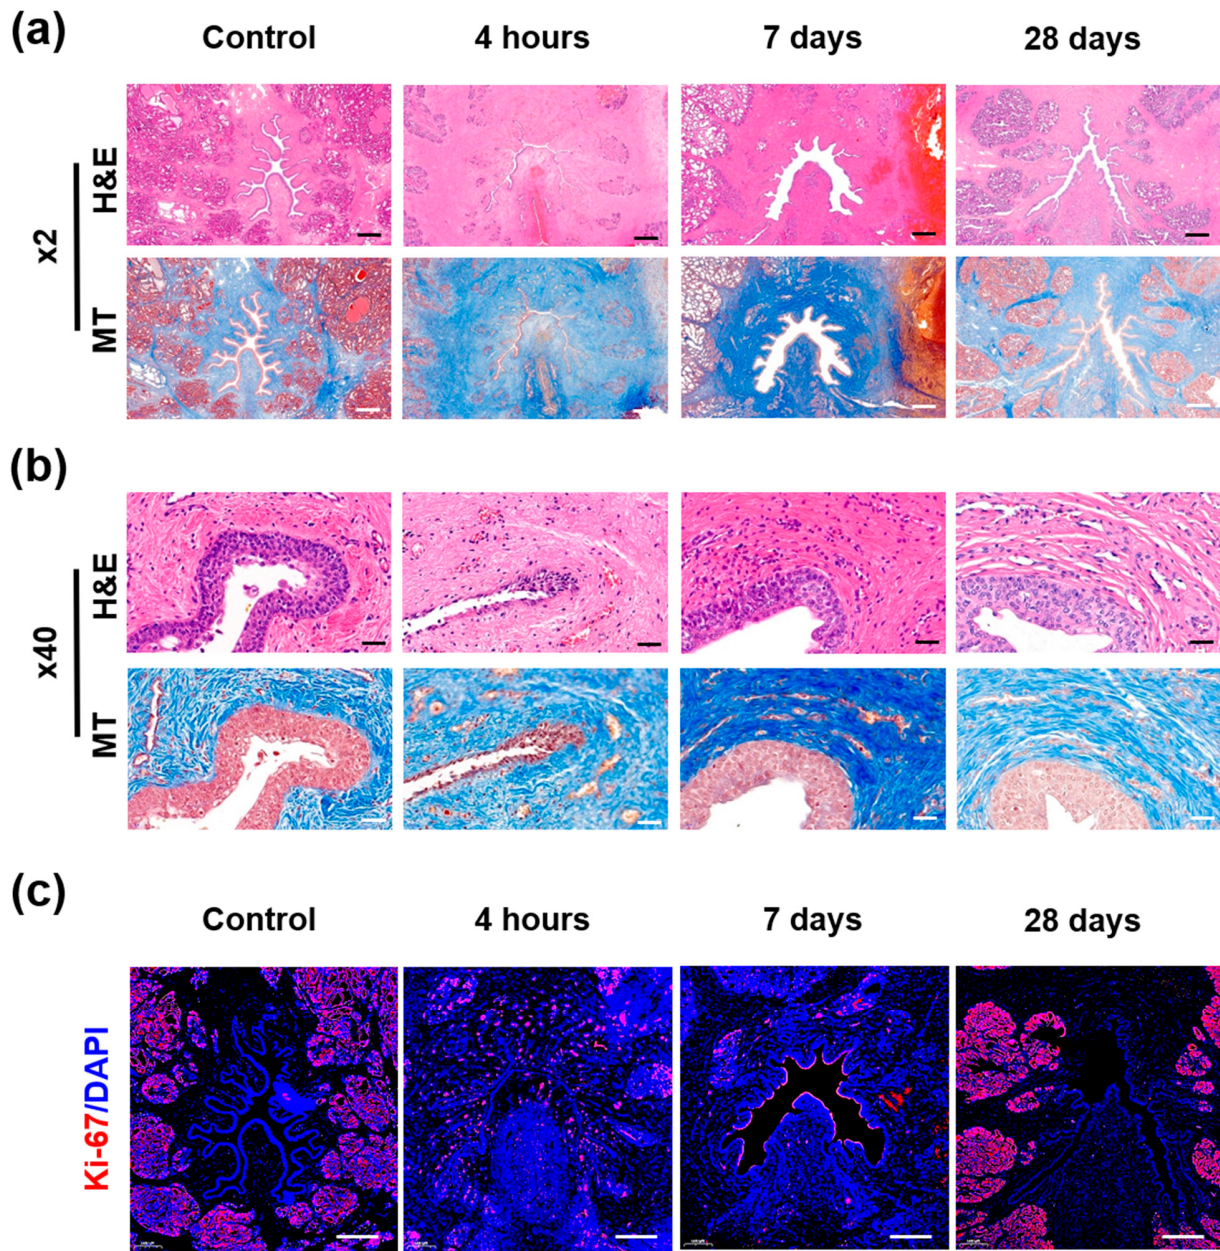

**Supplementary Figure S1.** Histological findings of the prostate after irreversible electroporation (IRE) with high-frequency pulsed electric field (HF-PEF). Hematoxylin and eosin (H&E), Masson's trichrome (MT), and terminal deoxynucleotidyl transferase-mediated dUTP nick and labeling (TUNEL)-stained sections after IRE with HF-PEF showed gradual histological changes.

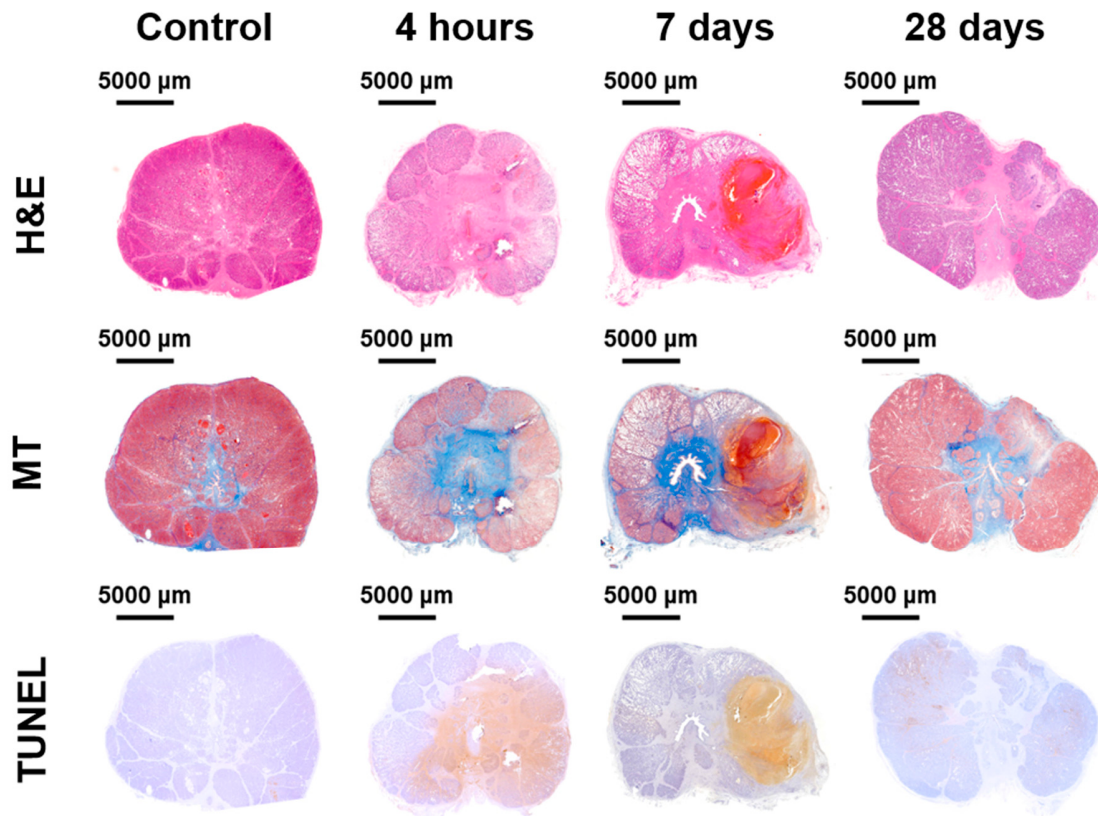

**Supplementary Figure S2.** Representative microscopic images of histopathological sections around the urethra. Hematoxylin and eosin (H&E)- and Masson's trichrome (MT)-stained sections are shown at (a) 2× magnification (scale bar: 5 mm) and (b) 40× magnification (scale bar: 250 μm). (c) Ki-67 immunofluorescence (DAPI, blue; and Ki67, red) images showing active cellular regeneration around the urethra (scale bar, 1 mm; 2× magnification).

**Supplementary Table S1.** Histological findings after IRE with HF-PEF in the beagle prostate

|                                               | <b>Control</b> | <b>4 hours</b> | <b><i>p</i>-value</b> | <b>7 days</b> | <b><i>p</i>-value</b> | <b>28 days</b> | <b><i>p</i>-value</b> |
|-----------------------------------------------|----------------|----------------|-----------------------|---------------|-----------------------|----------------|-----------------------|
| <b>Inflammatory cell infiltration (grade)</b> | 1.11 ± 0.33    | 1.40 ± 0.52    | 0.164                 | 4.00 ± 1.12   | 0.014                 | 2.80 ± 0.60    | 0.029                 |
| <b>MT fibrotic area (mm<sup>2</sup>)</b>      | 21.64 ± 0.58   | 66.75 ± 14.03  | 0.030                 | 32.04 ± 5.10  | 0.070                 | 30.31 ± 14.34  | 0.145                 |
| <b>TUNEL ablation area (mm<sup>2</sup>)</b>   | 2.69 ± 0.51    | 113.53 ± 5.57  | 0.003                 | 41.65 ± 5.99  | 0.015                 | 4.46 ± 1.20    | 0.063                 |
| <b>Ki-67 Positive area (%)</b>                | 0.70 ± 0.67    | 0.14 ± 0.22    | 0.017                 | 0.51 ± 0.13   | 0.090                 | 0.57 ± 0.07    | 0.082                 |

Note. Data are presented as means ± standard deviations
